# Supplementary material for: Mistaken Identifiers: Gene name errors can be introduced inadvertently when using Excel in bioinformatics
Source: Springer Nature journal article supplement (doi:10.1186/1471-2105-5-80), 2004-06-23
Supplement: 12859_2004_196_MOESM5_ESM.pdf [file 12859_2004_196_MOESM5_ESM.pdf]

```
#!/bin/csh

foreach arg ($*)
echo $arg

tr "\r" "\n" < $arg | sed '1,$s/\^M/\\
/g' | gawk
'(/[0-9]\-
(JAN|FEB|MAR|APR|MAY|JUN|JUL|AUG|SEP|OCT|NOV|DEC|Jan|Feb|
Mar|Apr|M
ay|Jun|Jul|Aug|Sep|Oct|Nov|Dec|jan|feb|mar|
apr|may|jun|jul|aug|sep|oct|nov|dec)/ ||
apr|may|jun|jul|aug|sep|oct|nov|/[0-9]\.[0-9][0-9]E\+[[0-
9][0-9]/)
{print NR,$0}'
end
```
